# Supplementary material
Source: PubMed Central journal article supplement (PMC1964831)

*Atg7*<sup>flox/flox</sup>

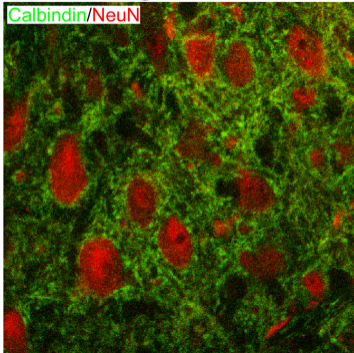

*Atg7*<sup>flox/flox</sup>; Pcp2-Cre

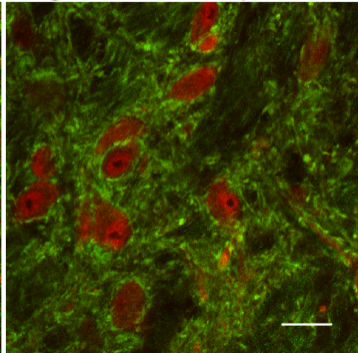

Supplement: pnas_0701311104_1.pdf [file pnas_0701311104_1.pdf]

Calbindin

Synaptophysin

Merge

*Atg7<sup>flox/flox</sup>*

*Atg7<sup>flox/flox</sup>; Pcp2-Cre*

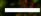

Supplement: pnas_0701311104_2.pdf [file pnas_0701311104_2.pdf]

*Atg7*<sup>flox/flox</sup>

*Atg7*<sup>flox/flox</sup>; Pcp2-Cre

p62/  
SQSTM1

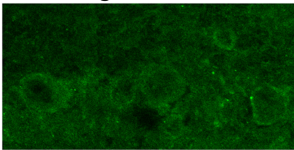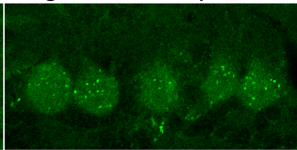

Calbindin

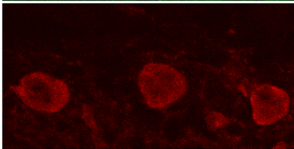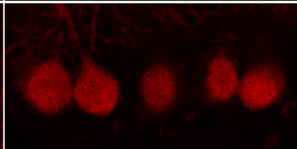

Merge

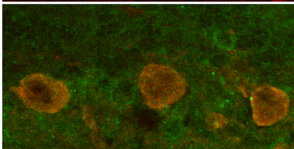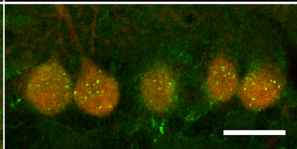

Supplement: pnas_0701311104_3.pdf [file pnas_0701311104_3.pdf]

p62/SQSTM1

Calbindin

Merge

Wild Type

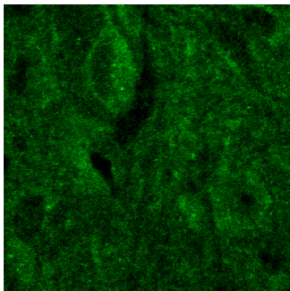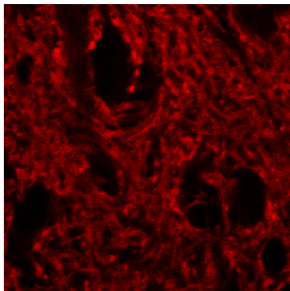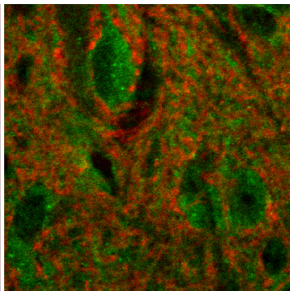

Lurcher

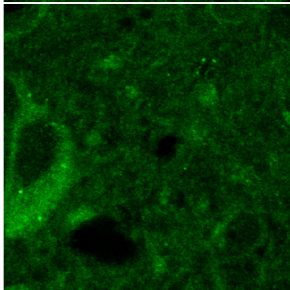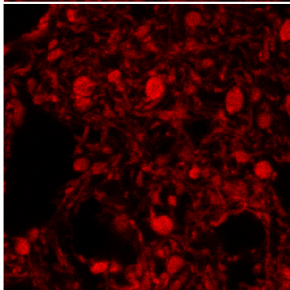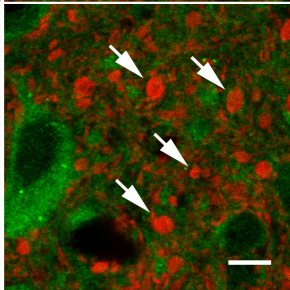

Supplement: pnas_0701311104_4.pdf [file pnas_0701311104_4.pdf]

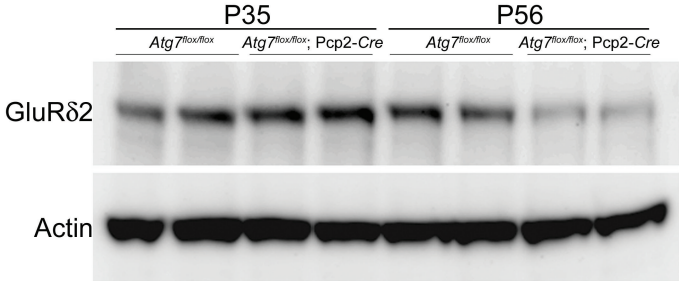

Supplement: pnas_0701311104_5.pdf [file pnas_0701311104_5.pdf]

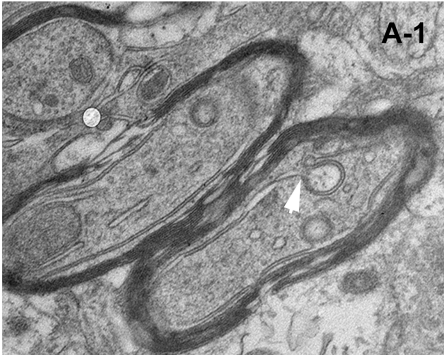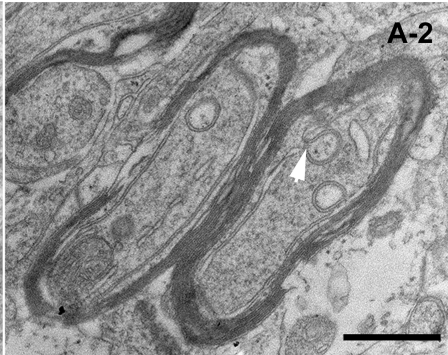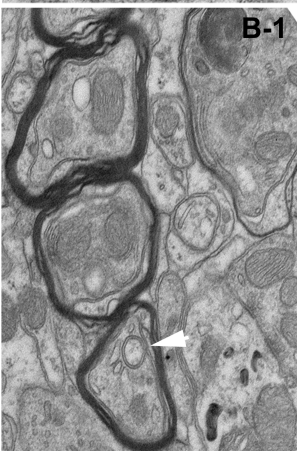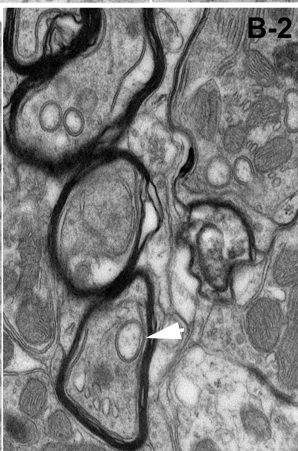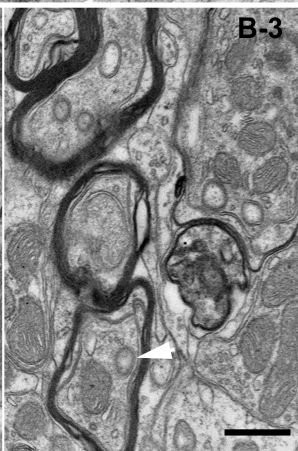

Supplement: pnas_0701311104_6.pdf [file pnas_0701311104_6.pdf]
